# Supplementary material for: Development of nomograms to predict axillary lymph node status in breast cancer patients
Source: Springer Nature journal article supplement (doi:10.1186/s12885-017-3535-7), 2017-08-23

A

Predicting any positive ALNs

— Training cohort    - - - Validation cohort

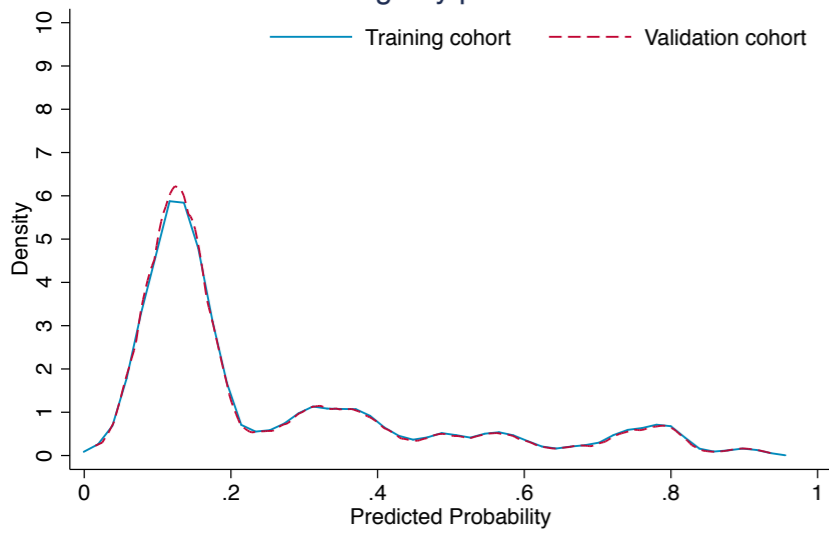

B

Predicting pN2-3 disease in ALNs(+) patients

— Training cohort    - - - Validation cohort

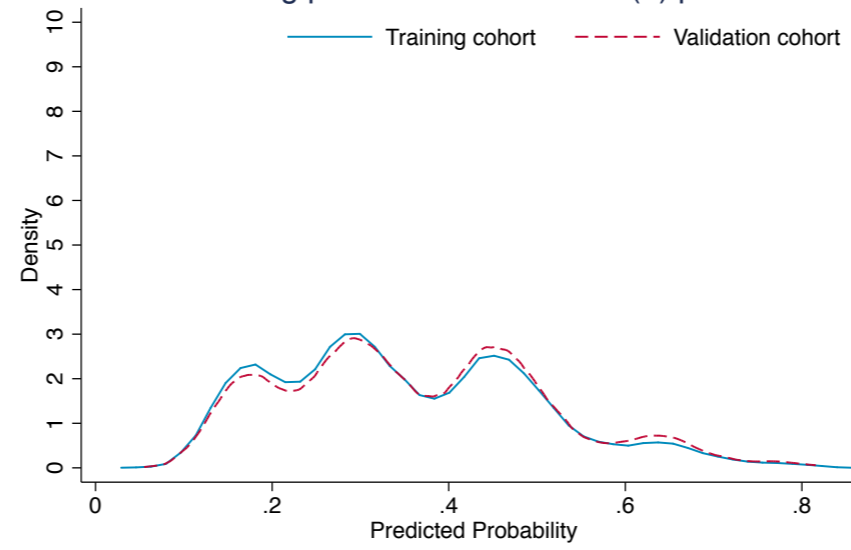

C

Predicting pN2-3 disease in all population

— Training cohort    - - - Validation cohort

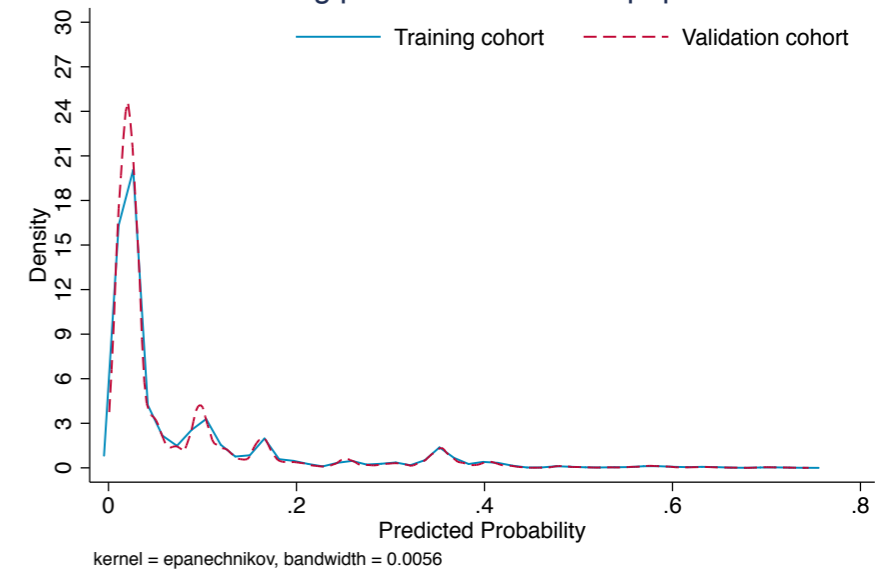

Supplement: MOESM2 [file 14235756]
